# Supplementary material for: Patient Survey of current water Intake practices in autosomal dominant Polycystic kidney disease: the SIPs survey
Source: PubMed Central journal article supplement (PMC5466085; doi:10.1093/ckj/sfw153), 2017-02-17
Supplement: sfw153_Supp.pdf [file sfw153_Supp.pdf]

## Survey: Water Study

---

### PKD Water Study

**People with Autosomal Dominant Polycystic Kidney Disease (ADPKD) - who haven't progressed to kidney failure - are often asked to drink plenty of water throughout the day, in the hope that this would slow worsening of kidney function over time.**

**However, the effect of drinking large amounts of water on kidney function is unknown.**

**We are considering a trial of 'high' versus 'normal' water intake to determine whether high intake is beneficial or harmful.**

**Your views would be extremely valuable in ensuring that any such study is acceptable to most patients, maximally informative, and not unnecessarily burdensome.**

**This survey should take no more than 10 minutes and is totally anonymous.**

**Please note that this trial will be conducted on people at earlier stages of ADPKD. So if you already have had a transplant or on dialysis, you cannot take part in this survey. Sorry!**

---

### Are you male or female?

- Male
  - Female
- 

### How old are you?

- 15-19
  - 20-24
  - 25-29
  - 30-34
  - 35-39
  - 40-44
  - 45-49
  - 50-54
  - 55-59
  - 60-64
  - 65 or older
  - Rather not say
- 

### Which area of the UK do you live in?

- East Midlands (Derbyshire, Nottinghamshire, Leicestershire, Northamptonshire, Lincolnshire, Rutland)
- East of England (Norfolk, Suffolk, Cambridgeshire, Bedfordshire, Hertfordshire, Essex)
- Greater London
- North East England (Northumberland, County Durham, Tyne and Wear)
- North West England (Cumbria, Lancashire, Cheshire, Merseyside, Greater Manchester)

- Northern Ireland
  - Scotland
  - South Central England (Oxfordshire, Buckinghamshire, Hampshire, Isle of Wight, Berkshire)
  - South East Coast (Kent, East Sussex, West Sussex, Surrey)
  - South West England (Cornwall, Devon, Somerset, Dorset, Wiltshire, Gloucestershire)
  - Wales
  - West Midlands (Staffordshire, Shropshire, Herefordshire, Worcestershire, Warwickshire, Birmingham)
  - Yorkshire and the Humber (North Yorkshire, East Yorkshire, South Yorkshire, West Yorkshire)
- 

**Which of these ethnic groups would you say you belong to?**

- White (British, Irish, Traveller, or any other White background)
  - Mixed/Multiple Ethnic groups (White and Black Caribbean, White and Black African, White and Asian, any other Mixed background)
  - Asian or Asian British (Indian, Pakistani, Bangladeshi, Chinese, any other Asian background)
  - Black or Black British (Caribbean, African, or any other Black background)
  - Prefer not to say
  - Other ethnic group
- 

**What is your employment status?**

- Employed
  - Self-employed
  - Out of work
  - Homemaker
  - Student
  - Military
  - Retired
  - Other
- 

**If you are employed or self-employed, what is your occupation?**

**At what age were you diagnosed with ADPKD?**

- Under 14
- 15-19
- 20-24
- 25-29
- 30-34
- 35-39
- 40-44

- 45-49
  - 50-54
  - 55-59
  - 60-64
  - 65 or older
  - Can't recall
- 

**How often do you see a specialist in the hospital for the management of ADPKD?**

---

**Do you have other family members affected?**

- Yes
  - No
  - Don't know
- 

**Do any family members live with you? The reason we ask this question is that family members may inadvertently influence your drinking habits, and this may affect the results of a study.**

---

**How often do you discuss your treatment/management with your affected family members (ranging from never to daily etc?)**

---

## **ABOUT YOUR CURRENT WATER DRINKING HABITS**

---

**How much water - in litres - do you drink daily? You can include the water you drink in tea, coffee, soup and other beverages.**

**For reference, a typical cup of tea has about 250ml (quarter of a litre) of water.**

- Less than 1 litre
- 1 - 1.5
- 1.5 - 2
- 2 - 2.5

- 2.5 - 3
  - 3 - 3.5
  - 3.5 - 4
  - More than 4 litres
- 

**Do you actively make an effort to drink throughout the day even when you are not thirsty?**

- Yes
  - No
- 

**Do you get up at night to pass urine?**

- Always
  - Frequently
  - Occasionally
  - Never
- 

**To what extent do you believe drinking water throughout the day can slow down the progression of PKD?**

---

**In the context of a research study which is likely to last at least 3 years:**

|                                                                                         | Yes                   | No                    | Don't know            |
|-----------------------------------------------------------------------------------------|-----------------------|-----------------------|-----------------------|
| Would you agree to drinking large amounts of water (more than 3 litres per day)?        | <input type="radio"/> | <input type="radio"/> | <input type="radio"/> |
| Would you agree to drink guided by thirst (for most people this is less than 2 litres)? | <input type="radio"/> | <input type="radio"/> | <input type="radio"/> |

---

## RESEARCH STUDY IMPLICATIONS

---

**A few final questions**

|                                                                                                                                                                  | Yes                   | No                    | Don't know            |
|------------------------------------------------------------------------------------------------------------------------------------------------------------------|-----------------------|-----------------------|-----------------------|
| Would you be willing to provide a urine sample on a regular basis (every 1 to 2 months)?                                                                         | <input type="radio"/> | <input type="radio"/> | <input type="radio"/> |
| Would you be willing to perform an occasional (3-4 times per year) 24 hour urine collection? This would be done at a time and place (eg home) convenient to you. | <input type="radio"/> | <input type="radio"/> | <input type="radio"/> |
| Would you be willing to have                                                                                                                                     |                       |                       |                       |

regular blood tests (after 3 months, then 6 monthly)?

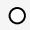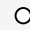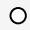

Would you be willing to test your own urine at home using a coloured test strip and colour chart, and record the result on a computer or smartphone application?

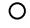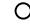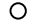

Would you take part in research projects aimed at slowing ADPKD progression?

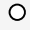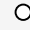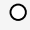

---

**Do you have any comments/suggestions on this survey and the questions?**

---

Share This Survey:

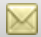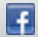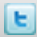

Online Survey Software Powered by  QuestionPro
